# Supplementary material
Source: PubMed Central journal article supplement (PMC5490374)

## Supplemental text

### Supplemental Figure legend

#### Figure S1. Related to Figure 2. Characterizing immediate changes in expression and chromatin accessibility

(A) Differential gene expression changes between undifferentiated HL-60 and 3 hour macrophages (321 genes), FDR < 1%, p-value < 0.01. (B and C) Differential gene expression of undifferentiated HL-60 and 6 hour neutrophils (146 genes) and monocytes (306 genes), FDR < 1%, p-value < 0.01. Representative genes are denoted by color.

(D and E) Schematic of immediate changes in gene expression. Branch lengths in diagrams represent the number of differentially expressed genes up-regulated for each cell-type at 3 and 6 hours post-differentiation. (F) Differential gene expression changes between undifferentiated HL-60 and 3 hour neutrophil (71 genes), FDR < 1%, p-value < 0.01. (G) Differential gene expression changes between undifferentiated HL-60 and 3 hour monocyte (64 genes), FDR < 1%, p-value < 0.01. (H) Differential gene expression changes between undifferentiated HL-60 and 6 hour macrophage (603 genes), FDR < 1%, p-value < 0.01. (I, J and K) Differential chromatin accessibility of early (0-24 hours) macrophage (n=465 chromatin elements), neutrophil (n=152 chromatin elements), and monocyte (n=276 chromatin elements) differentiation (p-value < 0.05). Chromatin accessibility dynamics are observed across several time-points and denoted respectively.

#### Figure S2. Related to Figure 3. Immediate effects of LPS-stimulation are dynamic across the transcriptome and chromatin landscape during myeloid differentiation

(A and B) Differential gene expression changes between 120-hour macrophages/neutrophils and 120-hour macrophages<sup>+LPS</sup> (210 genes)/neutrophils<sup>+LPS</sup> (687 genes), FDR < 1%, p-value < 0.01. Representative genes are colored and labeled for identification. FPKM values were log transformed. (C) Differential gene expression changes between 48-hour macrophages<sup>+LPS</sup> (911 genes) and monocyte-derived macrophages<sup>+LPS</sup> (878 genes), reflecting a majority cell-specific expression changes relative to LPS-mediated differences (FDR < 1%, p-value < 0.01). FPKM values were log transformed and n.s denotes not significant. (D) Diagram of LPS-mediated genes up-regulated and shared across all LPS treated time-points. Gene ontology analysis shows significant enrichment in terms for 16/25 genes. Red hexagon denotes enrichment in inflammatory and defense response (Benjamini <  $1 \times 10^{-7}$ ). Green triangle denotes enrichment in programmed cell death (Benjamini <  $5 \times 10^{-3}$ ). (E) Schematic design for integrative analysis of LPS-mediated changes in gene expression and chromatin accessibility. See experimental methods. (F) Cell-specific changes in differential chromatin accessibility across all myeloid cell-types, FDR < 1%, p-value < 0.01 (n=352 chromatin elements). Cluster size is denoted as (n) and colored boxes reflect cell-specific or combinatorial representation. (G) Heatmap of 237 differentially accessible LPS-mediated chromatin elements in neutrophils. Three chromatin clusters were derived using k-means. 10xRPM (Reads Per Million) values are log transformed and row-mean normalized for all data. Differential chromatin elements were associated to nearest genes (schematic, E) and shown with approximate chromatin element distance to gene TSS. Cluster size (n) is denoted. (H and H') Examples of LPS-mediated changes in chromatin accessibility and gene expression in neutrophils. Browser tracks of ATAC-seq data for neutrophils are normalized by read density. RNA-seq FPKM values are indicated for each gene and treatment. Colored boxes denote chromatin accessibility as static or dynamic. The change in gene expression and chromatin accessibility are well correlated for gene NFKBIA during LPS stimulation (top panel). Significant change in gene expression is observed for SOD2 without a significant change in promoter accessibility (bottom panel).

#### Figure S3. Related to Figure 3. LPS-mediated gene and open chromatin changes

(A) Differential gene expression changes between 48-hour macrophages and 48-hour macrophages<sup>+LPS</sup> (115 genes), FDR < 1%, p-value < 0.01. (B) Differential gene expression changes between 48-hour macrophages<sup>+LPS</sup> (27 genes) and 120-hour macrophages<sup>+LPS</sup> (60 genes), FDR < 1%, p-value < 0.01. (C) Differential gene expression changes between 120-hour monocytes and 120-hour monocytes<sup>+LPS</sup> (80 genes), FDR < 1%, p-value < 0.01. Representative genes are colored and labeled for identification. FPKM values were log transformed. (D) UCSC browser screenshot for S100A9 showing no change in gene expression and chromatin accessibility during LPS stimulation. ATAC-seq data for neutrophils are normalized by read density. RNA-seq FPKM values are indicated for each gene and treatment.

**Figure S4. Related to Figure 6. GFI1 gene regulatory subnetwork**

(A) Distribution of undifferentiated HL-60 PU.1 footprints identified by ATAC-seq that are also detected by PU.1 ChIP-seq. 4,838 (~89%) of PU.1 ATAC-seq footprints are also detected by PU.1 ChIP-seq. (B) Heatmaps of ATAC-seq read density is shown for undifferentiated HL-60 inferred PU.1 ATAC-seq footprints (Left; n=5436), PU.1 ATAC-seq footprints with a significant overlapping ChIP-seq PU.1 peak (Center; n=4,838; hypergeometric p-value <  $1.3e-51$ ), and PU.1 ChIP-seq read density for ChIP-seq PU.1 peaks with no ATAC-seq footprint detected (Right Blue heatmap; n=16,333). 10xRPM (Reads Per Million) values are log transformed and row-mean normalized for ATAC-seq and ChIP-seq data. ATAC-seq and ChIP-seq signal is shown for a window of +/-2 kb from the footprint center and ranked from strongest to weakest for all comparisons. (C) AUROC analysis of top 5,000 PU.1 ChIP-seq peaks in undifferentiated HL-60 (AUROC = 0.93). (D) GFI1 expression demonstrates a cell-specific pattern during myeloid differentiation. Maximal expression is observed in neutrophils, with minimal to no expression detected in monocyte-derived macrophages. Mean FPKM values for each time-series are shown. (E-I) GFI1 sub-circuits are shown for (E) undifferentiated HL-60, (F) neutrophil, (G) macrophage, (H) monocyte, and (I) monocyte-derived macrophages. The GFI1-MAFB interaction and GFI1 auto-regulatory feedback loop is specific to neutrophil cells. Colored edges indicate that a regulatory interaction was observed for the respective time-point. Dashed grey edges indicate regulatory interactions observed at other time-points or cell-types respectively. Colored grey gene arrows indicate no mRNA detected at a given time-point.

**Figure S5. Related to Figure 5. EGR gene regulatory subnetworks**

(A) Genome-view of the EGR transcription factor sub-circuitry in differentiated myeloid cells. EGR motifs are generally indistinguishable between protein family members, thus regulatory interactions are inferred from all three EGR factors (EGR1, EGR2, EGR3). (B-F) Sub-circuits of EGR regulation for (B) undifferentiated HL-60, (C) monocyte-derived macrophage, (D) monocyte, (E) macrophage, and (F) neutrophil. Our network analysis infers regulatory interactions specific to both myeloid cells and EGR members. Colored edges indicate that a regulatory interaction was observed for the respective time-point. Dashed grey edges indicate regulatory interactions observed at other time-points or cell-types respectively. Colored grey gene arrows indicate no mRNA detected at a given time-point. (G) Dynamic kinetics of EGR1 (top), EGR2 (middle), EGR3 (bottom) gene expression profiles during myeloid differentiation. We observe a rapid change in EGR expression in macrophage cells with a general increase in expression across all cells. Mean FPKM values for each time-series are shown. Colored dash lines indicate the summed expression of all EGR members for each respective time-point and cell-type.

**Figure S6. Related to Figure 2. ATAC-seq data quality assessment**

(A) Distribution of ATAC-seq sample efficiencies. Mean = 32%, median = 31%. (B) Histogram of consolidated ATAC-seq peaks. N= 69,658 peaks. Mean = 500bp. (C) Fraction of ATAC-seq peaks that are promoter-based (25%, +/- 1kb of TSS) or non-promoter based (75%). (D) UCSC browser screenshot of IRF3 and MAF loci emphasizing static (grey) and dynamic (red) chromatin accessibility during myeloid differentiation. Scale is 10xRPM.

Table S1. Previously validated regulatory interactions, Related to Figure 5.

| Interactions                    | Citations                                                                                                                                                                                                                                                                                                                                                                                                                                                                                                                                                                                                                                                                                                                                         |
|---------------------------------|---------------------------------------------------------------------------------------------------------------------------------------------------------------------------------------------------------------------------------------------------------------------------------------------------------------------------------------------------------------------------------------------------------------------------------------------------------------------------------------------------------------------------------------------------------------------------------------------------------------------------------------------------------------------------------------------------------------------------------------------------|
| GFI<br>Auto-regulatory<br>Loop  | 1. Yücel, R., Kosan, C., Heyd, F., and Möröy, T. (2004). Gfi1: Green fluorescent protein knock-in mutant reveals differential expression and autoregulation of the growth factor independence 1 (Gfi1) gene during lymphocyte development. <i>The Journal of Biological Chemistry</i> 279, 40906–40917.                                                                                                                                                                                                                                                                                                                                                                                                                                           |
| EGR->GFI1                       | 1. Chen, H., Ray-Gallet, D., Zhang, P., Hetherington, C.J., Gonzalez, D.A., Zhang, D.E., Moreau-Gachelin, F., and Tenen, D.G. (1995). PU.1 (Spi-1) autoregulates its expression in myeloid cells. <i>Oncogene</i> 11, 1549–1560.<br>2. Okuno, Y., Huang, G., Rosenbauer, F., Evans, E.K., Radomska, H.S., Iwasaki, H., Akashi, K., Moreau-Gachelin, F., Li, Y., Zhang, P., et al. (2005). Potential autoregulation of transcription factor PU.1 by an upstream regulatory element. <i>Mol Cell Biol</i> 25, 2832–2845.                                                                                                                                                                                                                            |
| EGR->PU.1                       | 1. Laslo, P., Spooner, C.J., Warmflash, A., Lancki, D.W., Lee, H.J., Sciammas, R., Gantner, B.N., Dinner, A.R., and Singh, H. (2006). Multilineage Transcriptional Priming and Determination of Alternate Hematopoietic Cell Fates. <i>Cell</i> 126, 755–766<br>2. Dahl, R., Iyer, S.R., Owens, K.S., Cuylear, D.D., and Simon, M.C. (2007). The transcriptional repressor GFI-1 antagonizes PU.1 activity through protein-protein interaction. <i>The Journal of Biological Chemistry</i> 282, 6473–6483.<br>3. Spooner, C.J., Cheng, J.X., Pujadas, E., Laslo, P., and Singh, H. (2009). A Recurrent Network Involving the Transcription Factors PU.1 and Gfi1 Orchestrates Innate and Adaptive Immune Cell Fates. <i>Immunity</i> 31, 576–586. |
| EGR<br>Auto-regulatory<br>Loop  | 1. Kubosaki, A., Tomaru, Y., Tagami, M., Arner, E., Miura, H., Suzuki, T., Suzuki, M., Suzuki, H., and Hayashizaki, Y. (2009). Genome-wide investigation of in vivo EGR-1 binding sites in monocytic differentiation. <i>Genome Biology</i> 10, R41.                                                                                                                                                                                                                                                                                                                                                                                                                                                                                              |
| RUNX1->PU.1                     | 1. Koh, C.P., Wang, C.Q., Ng, C.E.L., Ito, Y., Araki, M., Tergaonkar, V., Huang, G., and Osato, M. (2013). RUNX1 meets MLL: epigenetic regulation of hematopoiesis by two leukemia genes. <i>Leukemia</i> 27, 1793–1802.                                                                                                                                                                                                                                                                                                                                                                                                                                                                                                                          |
| CEBPA->PU.1                     | 1. Kummalu, T., and Friedman, A.D. (2003). Cross-talk between regulators of myeloid development: C/EBPalpha binds and activates the promoter of the PU.1 gene. <i>Journal of Leukocyte Biology</i> 74, 464–470.<br>2. Yeaman, C., Wang, D., Paz-Priel, I., Torbett, B.E., Tenen, D.G., and Friedman, A.D. (2007). C/EBP $\alpha$ binds and activates the PU.1 distal enhancer to induce monocyte lineage commitment. <i>Blood</i> 110, 3136–3142.                                                                                                                                                                                                                                                                                                 |
| PU.1<br>Auto-regulatory<br>Loop | 1. Laslo, P., Spooner, C.J., Warmflash, A., Lancki, D.W., Lee, H.J., Sciammas, R., Gantner, B.N., Dinner, A.R., and Singh, H. (2006). Multilineage Transcriptional Priming and Determination of Alternate Hematopoietic Cell Fates. <i>Cell</i> 126, 755–766<br>2. Kubosaki, A., Tomaru, Y., Tagami, M., Arner, E., Miura, H., Suzuki, T., Suzuki, M., Suzuki, H., and Hayashizaki, Y. (2009). Genome-wide investigation of in vivo EGR-1 binding sites in monocytic differentiation. <i>Genome Biology</i> 10, R41.                                                                                                                                                                                                                              |

Table S2. RNA-seq mapping and gene statistics, Related to Figure 1.

| timepoint  | Mapped Reads Rep1 | Rep1 (Genes $\geq$ 1FPKM) | Mapped Reads Rep2 | Rep2 (Genes $\geq$ 1FPKM) | Mapped Reads Rep3 | Rep3 (Genes $\geq$ 1FPKM) |
|------------|-------------------|---------------------------|-------------------|---------------------------|-------------------|---------------------------|
| HL60       | 6154689           | 9741                      | 5488706           | 10474                     | 7539157           | 9783                      |
|            |                   |                           |                   |                           |                   |                           |
| 3hMac      | 9390991           | 10675                     | 13645567          | 10936                     | 6672709           | 10653                     |
| 6hMac      | 12653681          | 10865                     | 5777659           | 11753                     | 10698299          | 10860                     |
| 12hMac     | 16715424          | 10739                     | 4516460           | 10486                     | 7845936           | 10690                     |
| 24hMac     | 13177463          | 10389                     | 7775620           | 9284                      | 10402368          | 10333                     |
| 48hMac     | 14028485          | 10850                     | 11892768          | 10098                     | 13040112          | 10887                     |
| 48hMacLPS  | 7816972           | 10871                     | 7482155           | 10372                     | 6928836           | 9921                      |
| 96hMac     | 11903380          | 11311                     | 7033533           | 10195                     | 9808073           | 11322                     |
| 120hMac    | 12958949          | 11297                     | 3792723           | 10729                     | 9183211           | 11207                     |
| 120hMacLPS | 10115837          | 10321                     | 6392176           | 10931                     | 8465377           | 10283                     |
|            |                   |                           |                   |                           |                   |                           |
| 3hNeu      | 15895154          | 10233                     | 4639679           | 11949                     | 9823357           | 10099                     |
| 6hNeu      | 14084780          | 11021                     | 5322924           | 12345                     | 9703683           | 11044                     |
| 12hNeu     | 13849183          | 11116                     | 10701844          | 11597                     | 6989124           | 11649                     |
| 24hNeu     | 8321257           | 11040                     | 4799889           | 11962                     | 6920818           | 11039                     |
| 48hNeu     | 7713569           | 11381                     | 6851110           | 12428                     | 7654270           | 11408                     |
| 96hNeu     | 11475357          | 11409                     | 5034765           | 12355                     | 10172341          | 11369                     |
| 120hNeu    | 10724204          | 10800                     | 4673896           | 10197                     | 8098747           | 10829                     |
| 120hNeuLPS | 12100881          | 10921                     | 3453494           | 10231                     | 8772061           | 10765                     |
|            |                   |                           |                   |                           |                   |                           |
| 3hMon      | 22328471          | 10115                     | 5052596           | 10656                     | 13532706          | 10048                     |
| 6hMon      | 15232215          | 11032                     | 10190000          | 10725                     | 11189290          | 10915                     |
| 12hMon     | 13709700          | 10837                     | 5612264           | 10612                     | 10703588          | 10810                     |
| 24hMon     | 8708230           | 10775                     | 7670826           | 10609                     | 7080736           | 10806                     |
| 48hMon     | 9682744           | 10796                     | 9500706           | 10343                     | 4514870           | 10845                     |
| 96hMon     | 9929608           | 11430                     | 11727819          | 10608                     | 8610421           | 11379                     |
| 120hMon    | 6728988           | 10402                     | 10183696          | 10311                     | 7008633           | 10356                     |
| 120hMonLPS | 12542787          | 10827                     | 14251212          | 10392                     | 11654848          | 10421                     |
| 123MonPMA  | 10105831          | 9787                      | 13316722          | 10057                     | 10088885          | 9754                      |
| 126hMonPMA | 12558612          | 10040                     | 9645119           | 10371                     | 10848325          | 10005                     |
| 132hMonPMA | 10878166          | 9752                      | 12117241          | 10084                     | 13698050          | 9679                      |
| 144hMonPMA | 10722983          | 9922                      | 10419368          | 10324                     | 13447850          | 10311                     |
| 168hMonPMA | 10298754          | 9549                      | 10343884          | 10443                     | 10198220          | 9511                      |
| 168hMonLPS | 11186064          | 10321                     | 12422216          | 10982                     | 14851458          | 10521                     |
| total (M)  | 373693409         |                           | 261728637         |                           | 306146359         |                           |

Fig S1

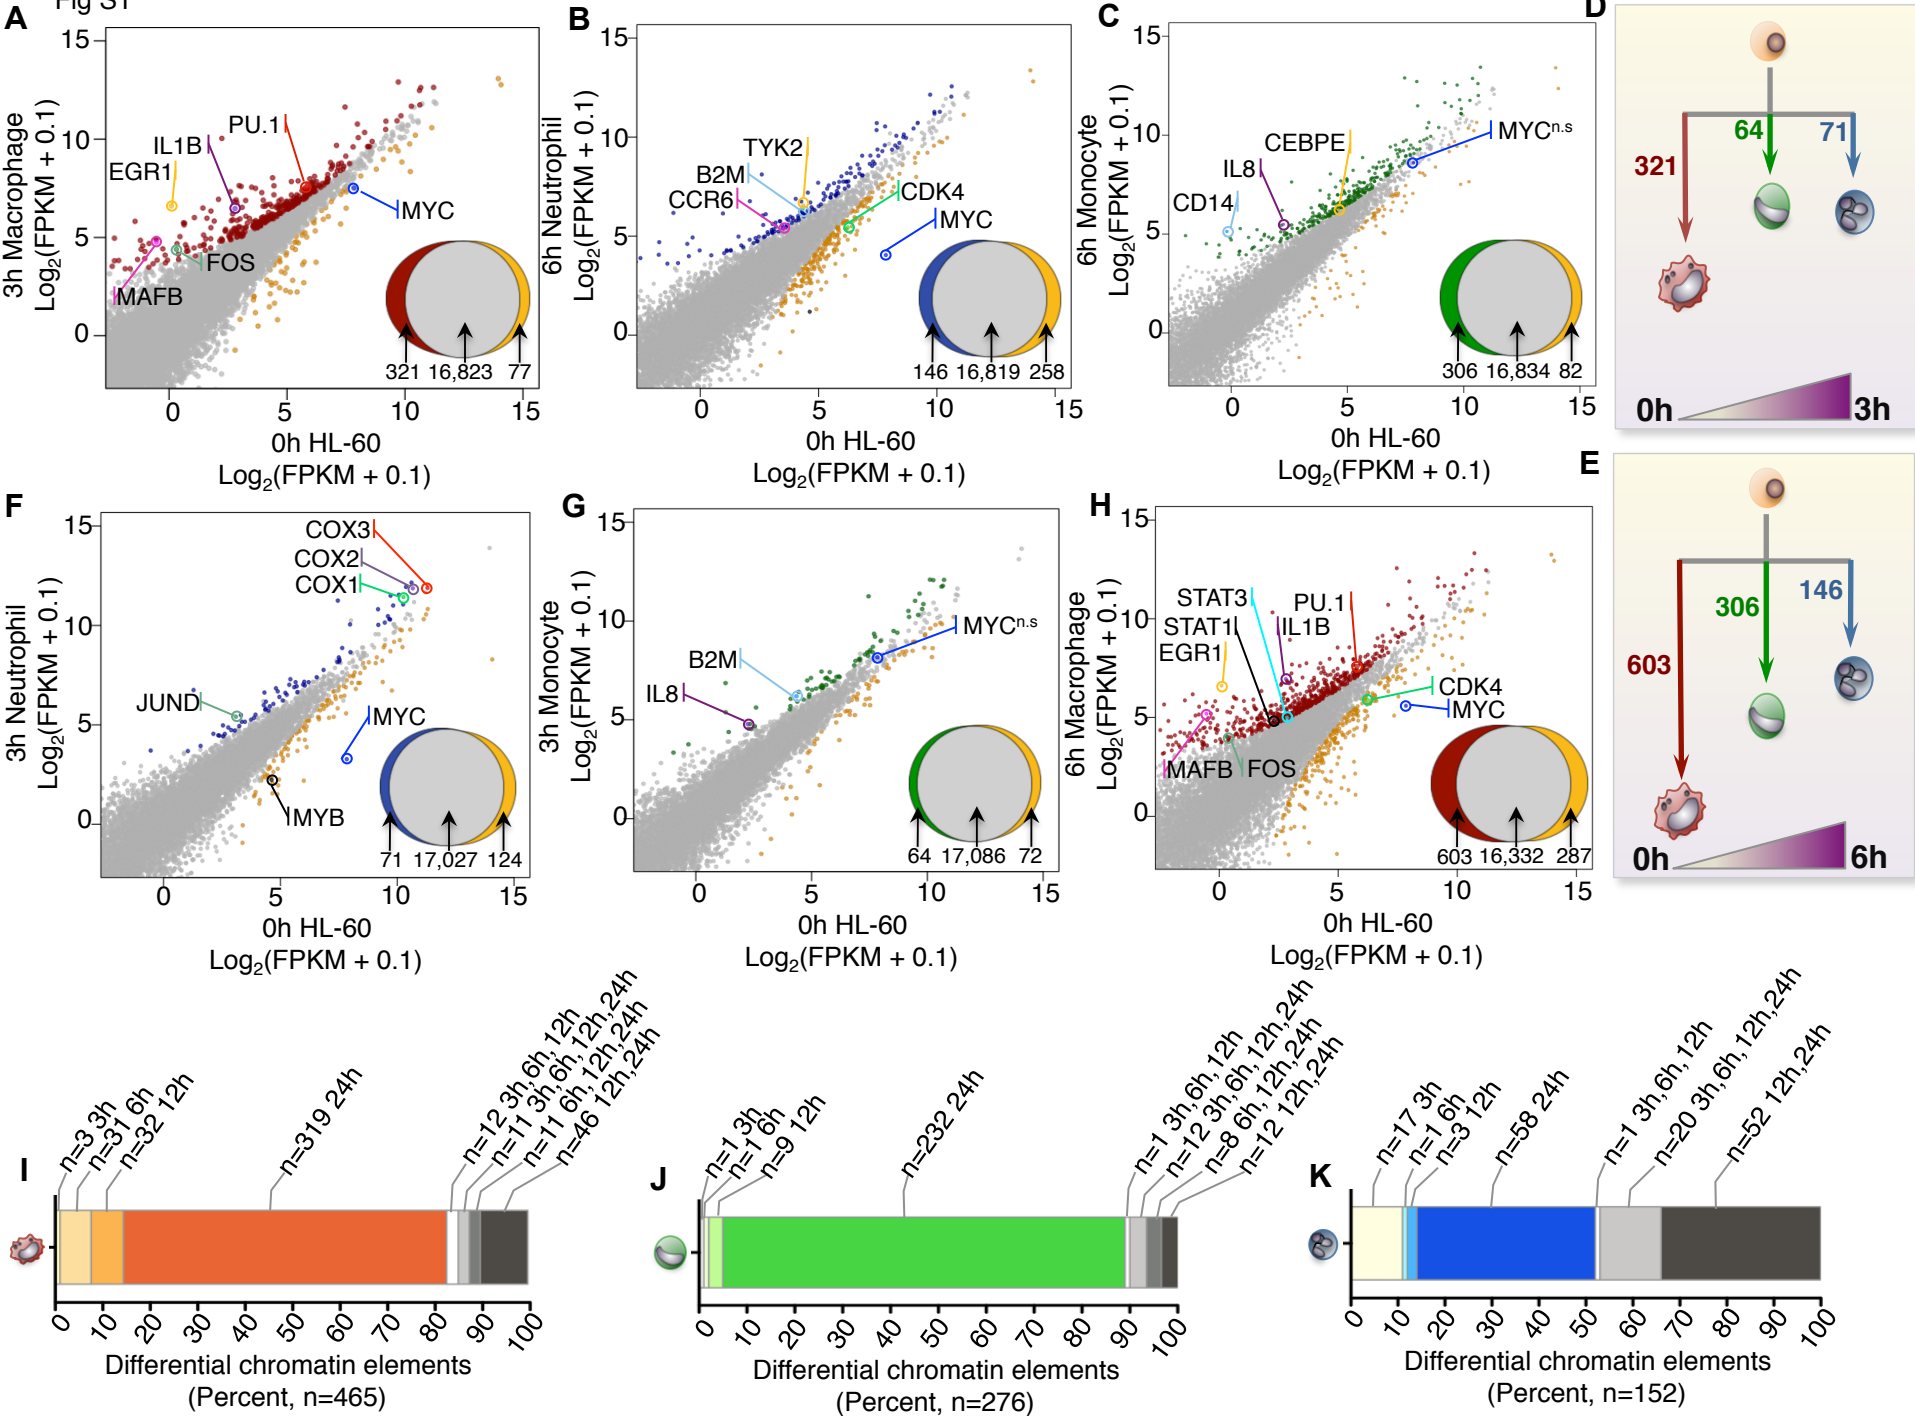

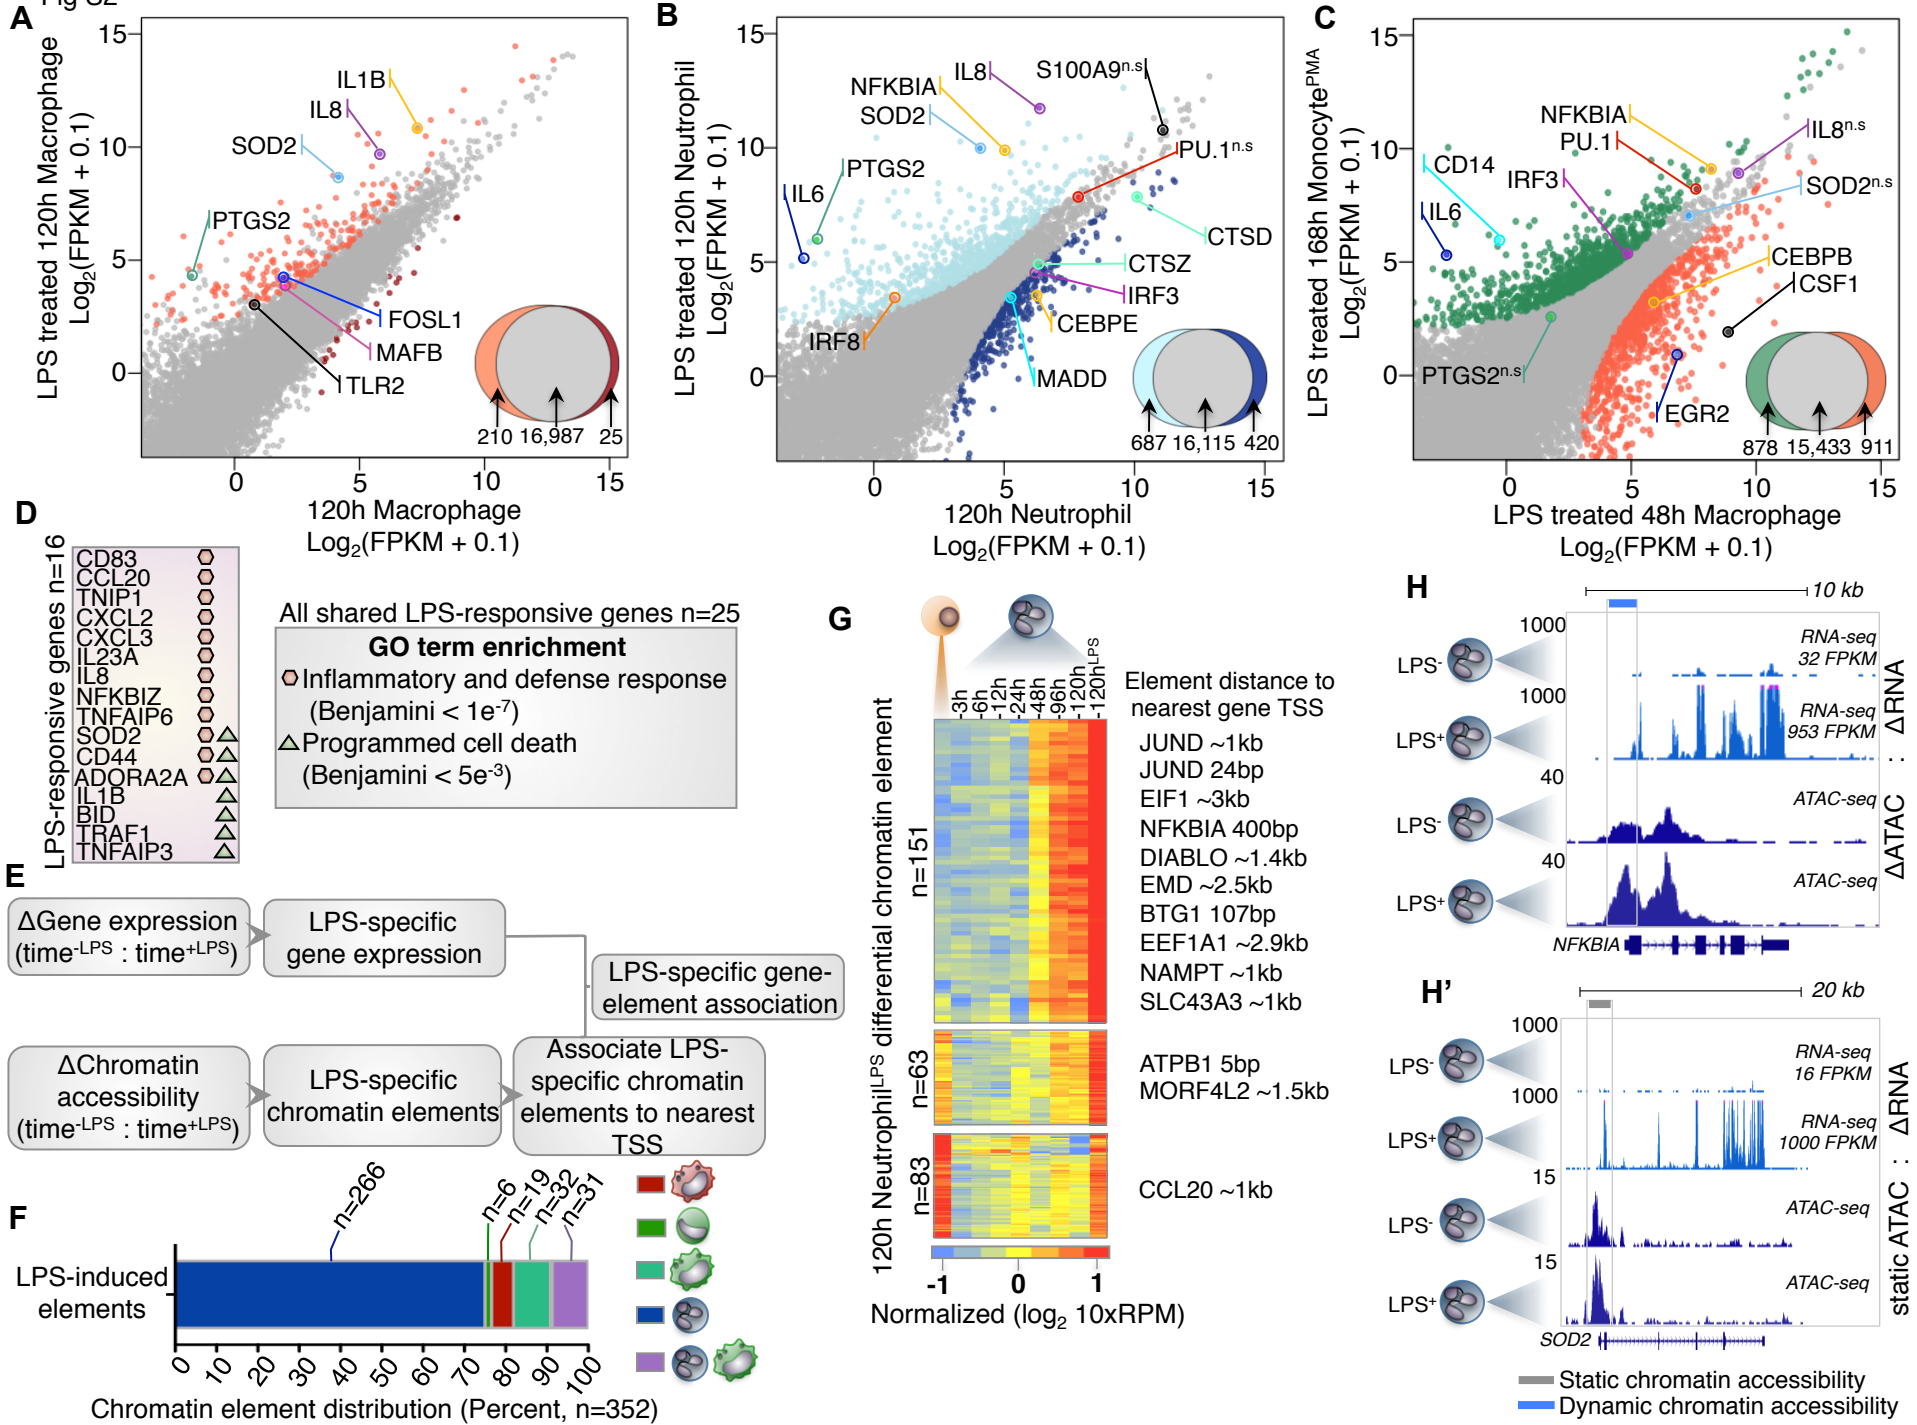

Fig S3

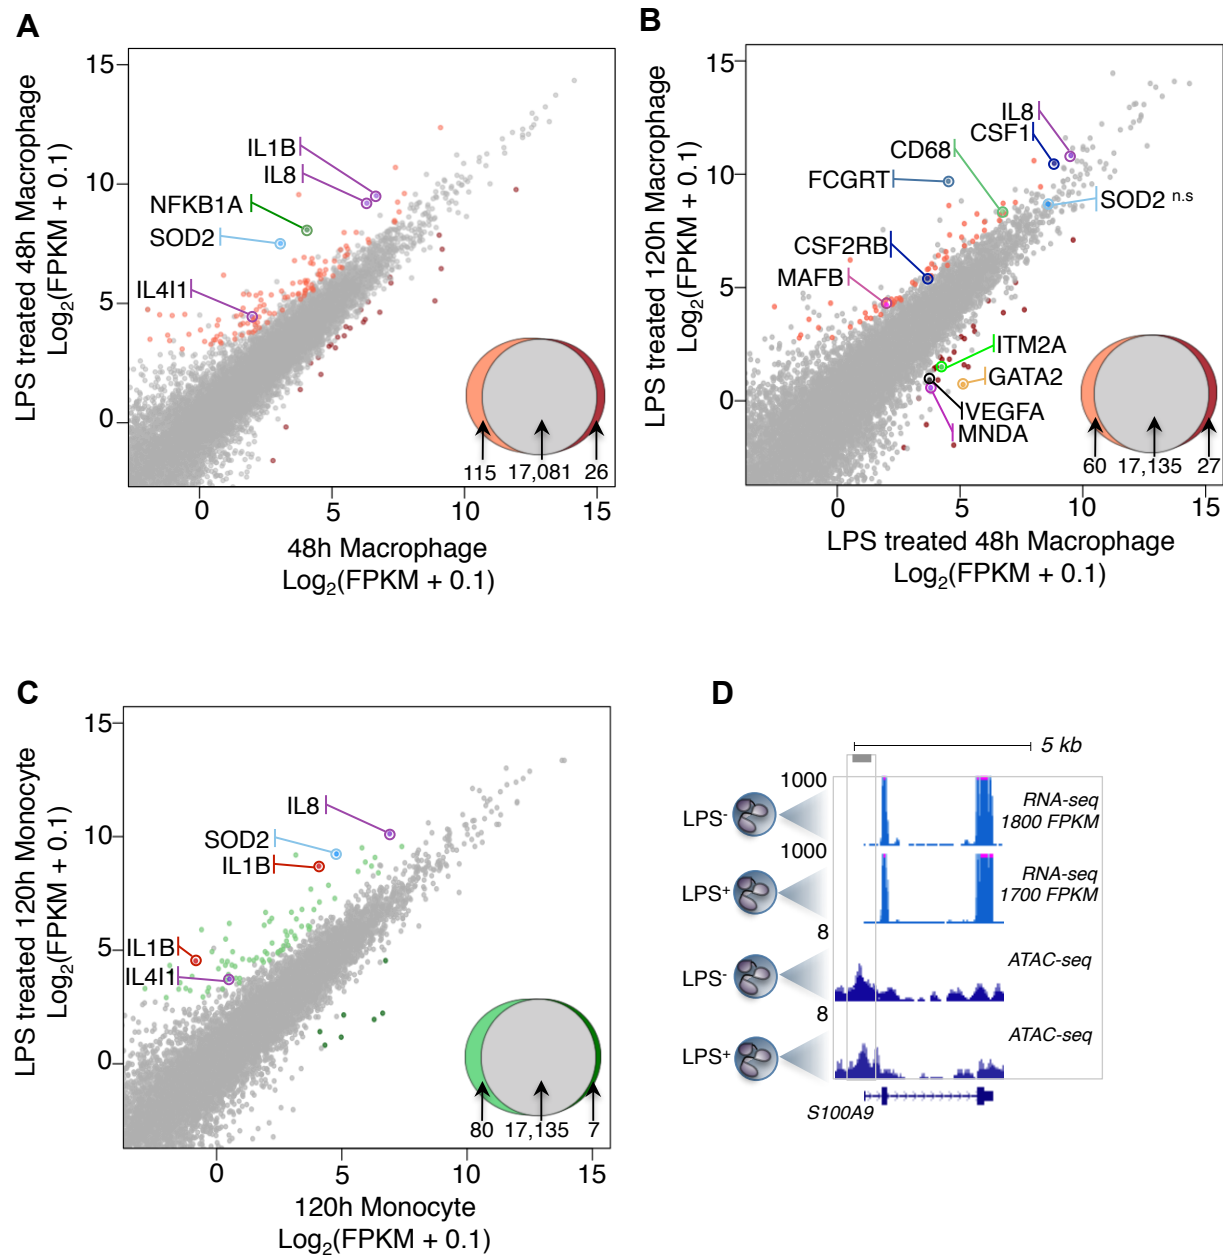

**A** Fig S4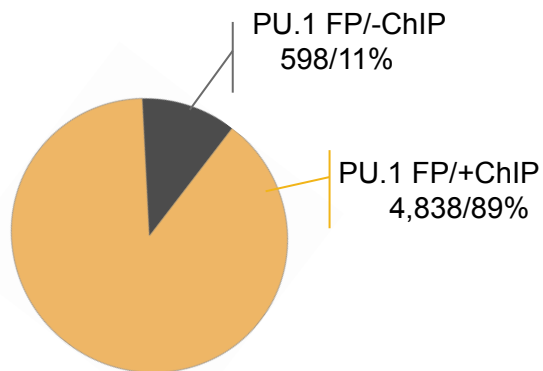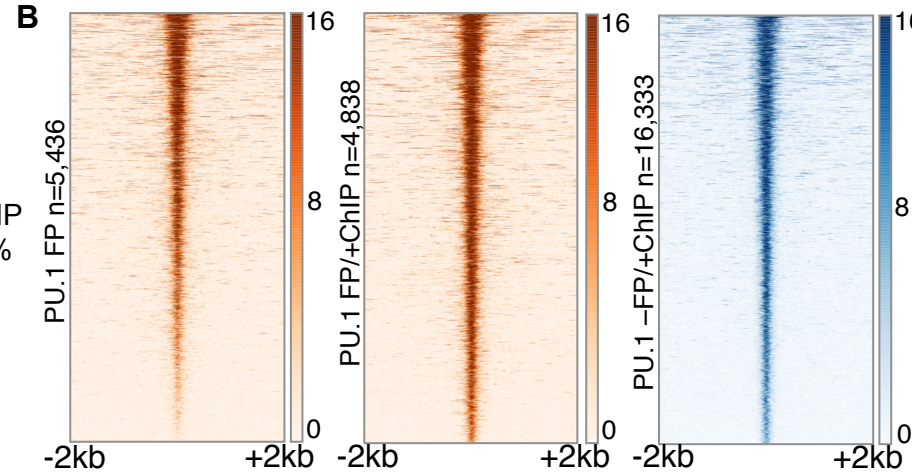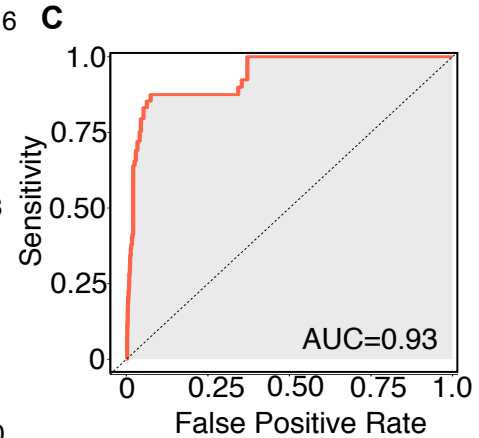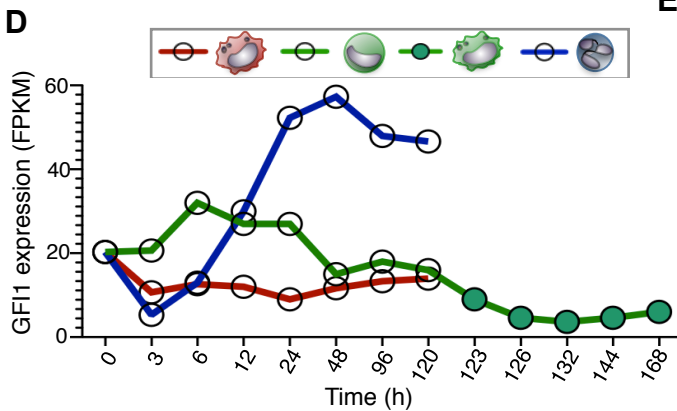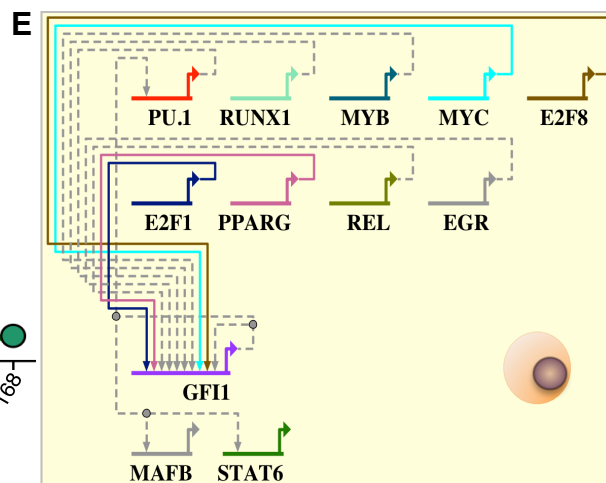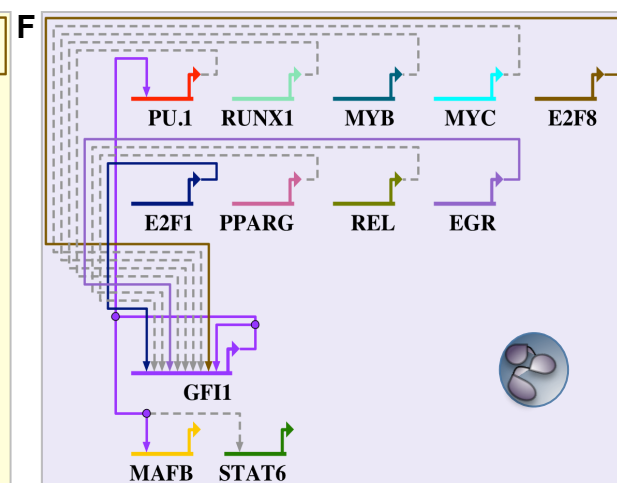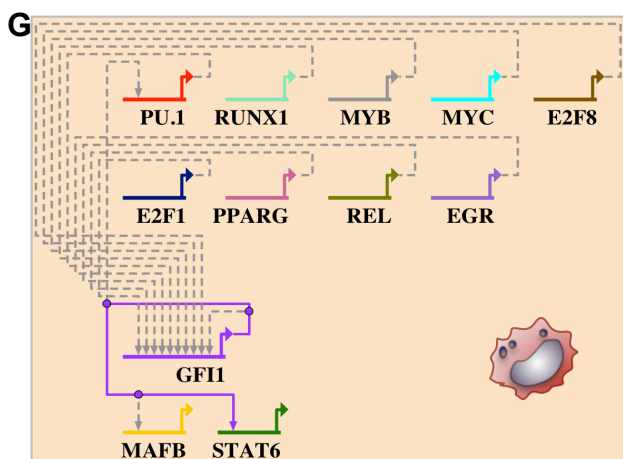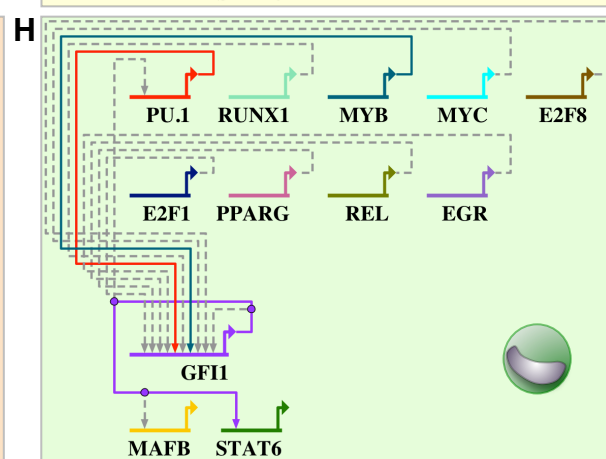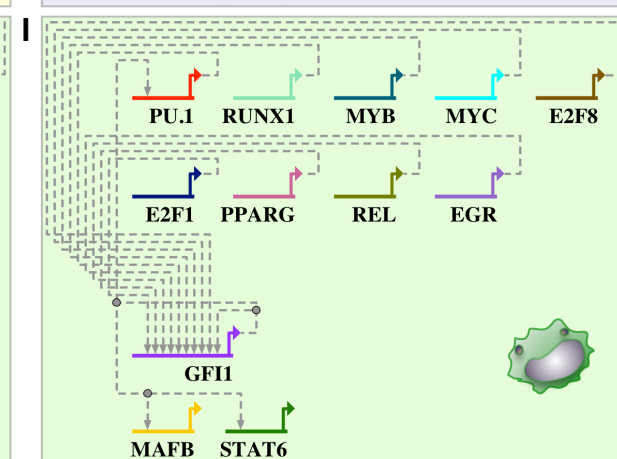



**A Fig S5**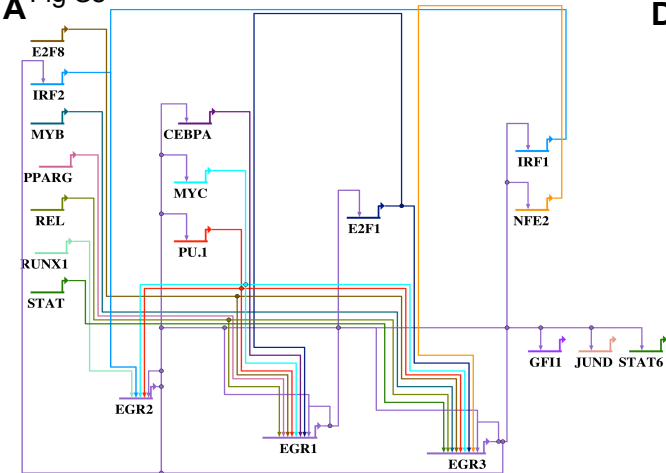**D**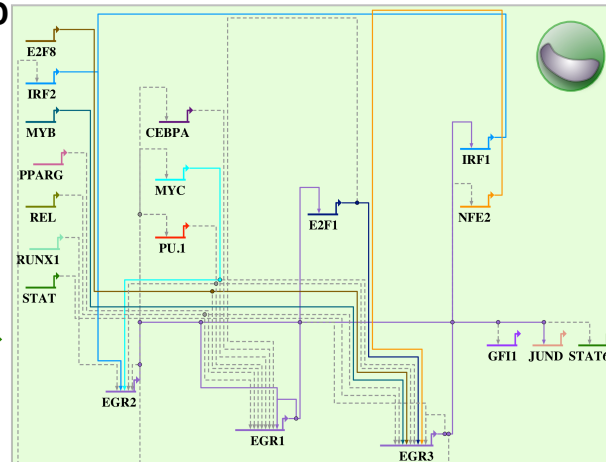**G**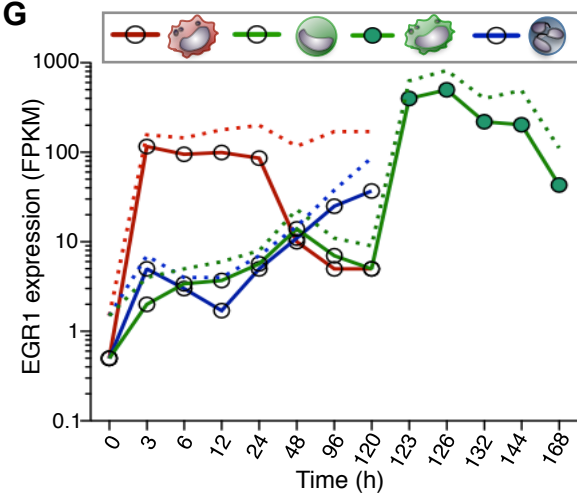**B**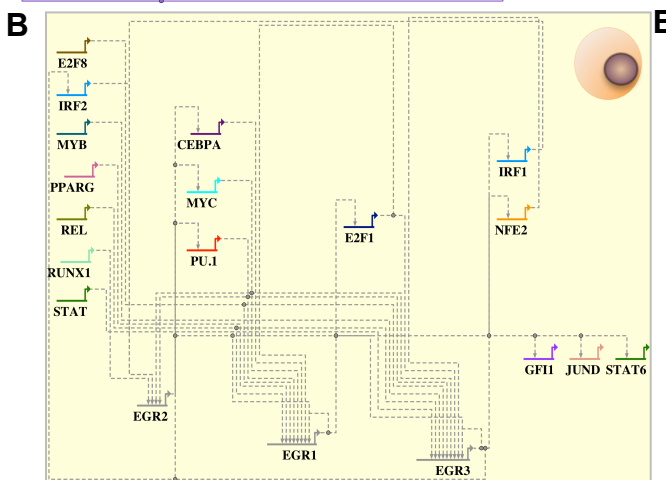**E**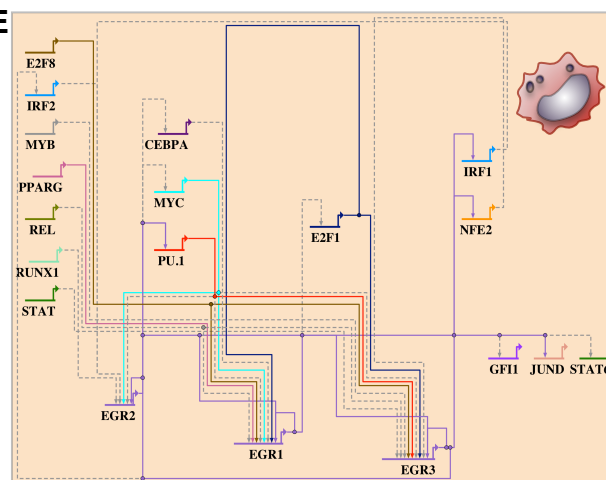**H**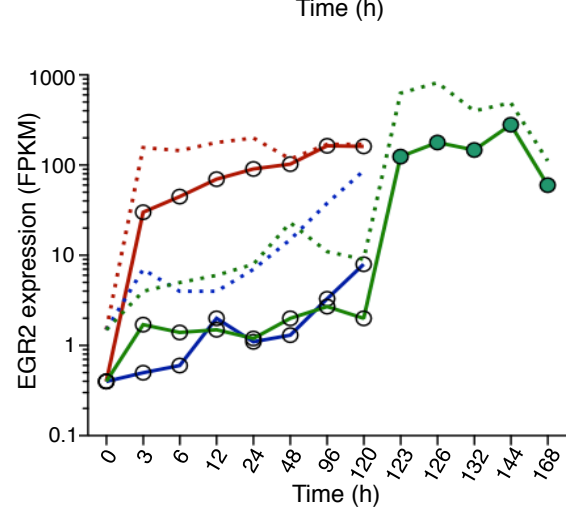**C**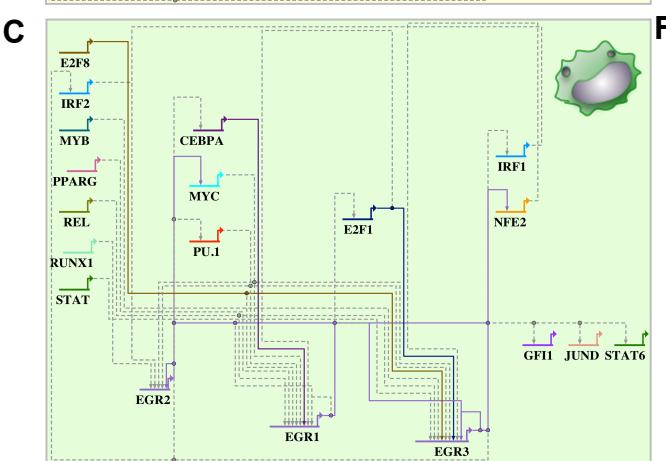**F**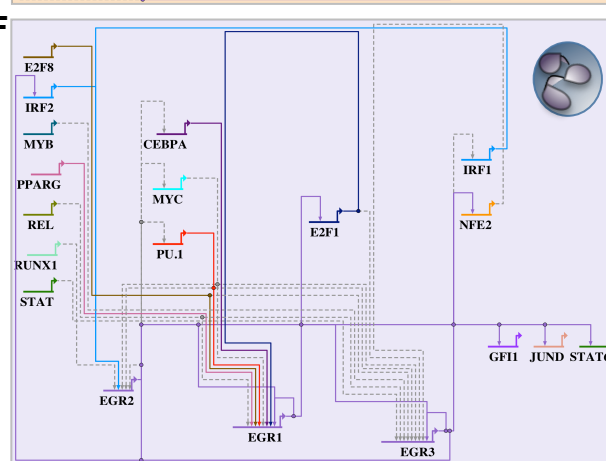**I**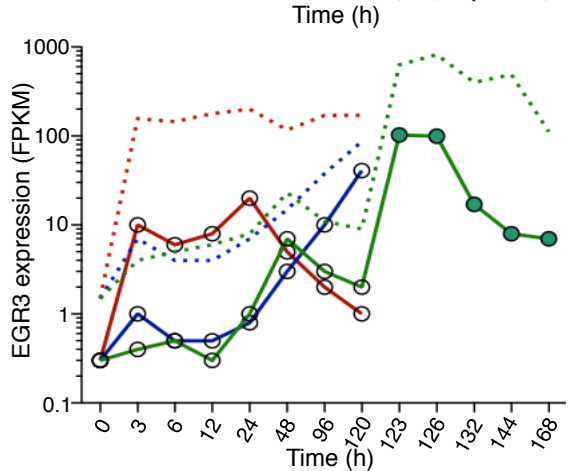

Fig S6

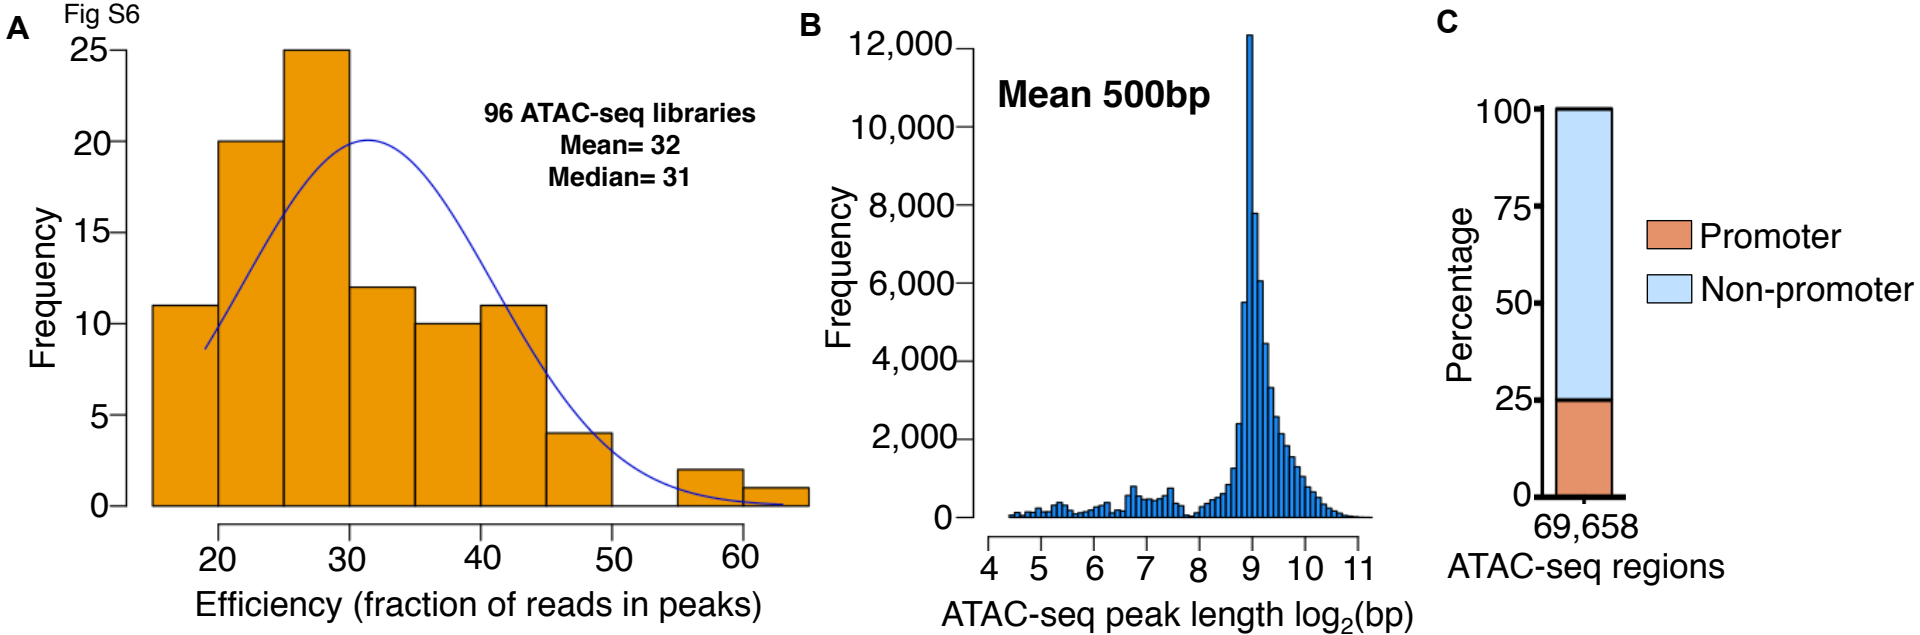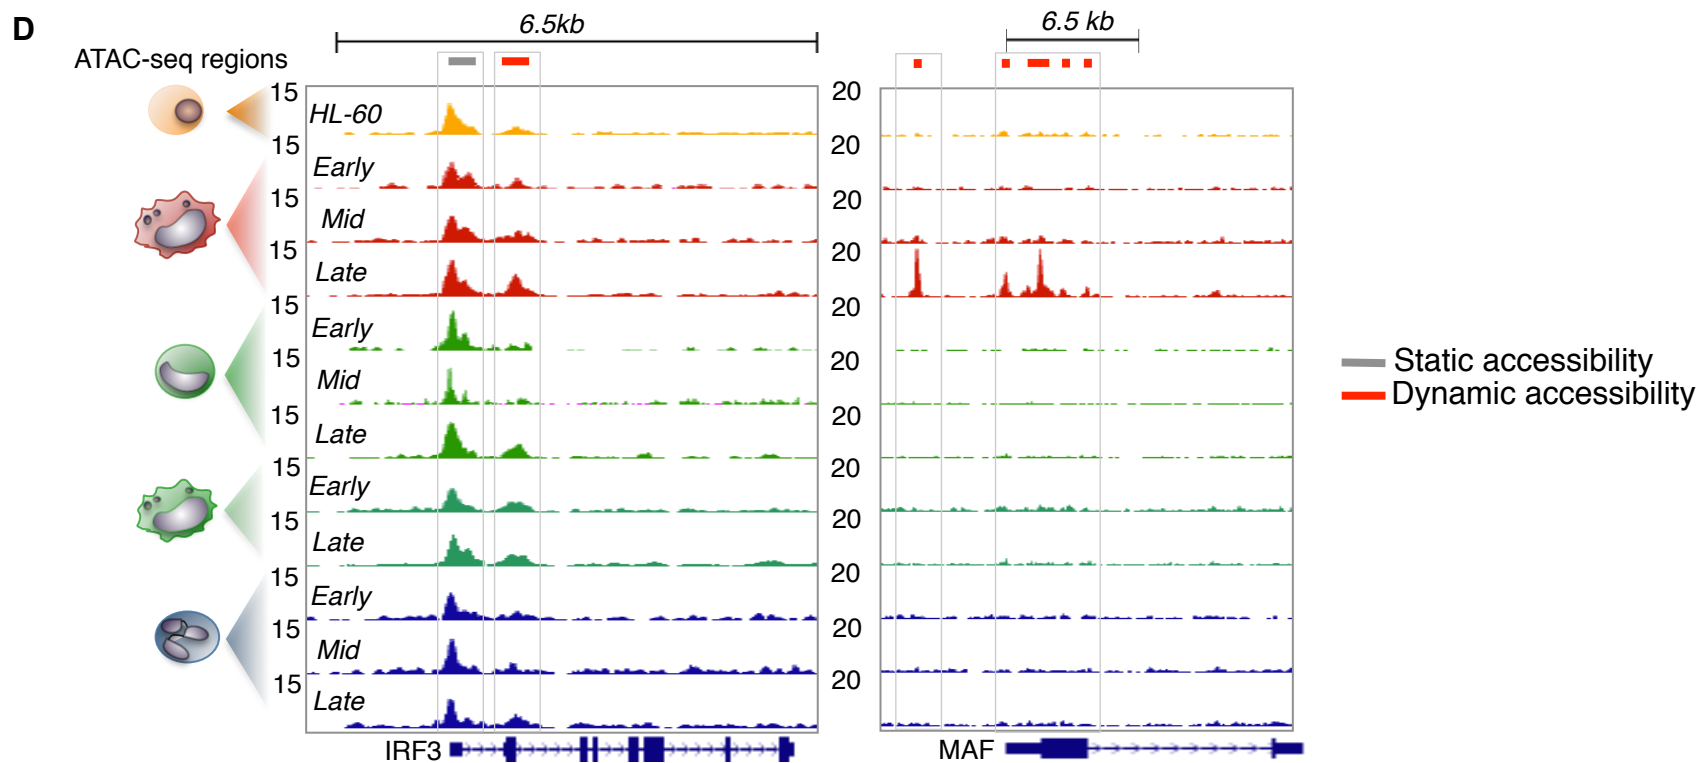

Supplement: NIHMS859564-supplement.pdf [file NIHMS859564-supplement.pdf]
